# Supplementary material for: Gram-Level Production of Balanol through Regulatory Pathway and Medium Optimization in Herb Fungus Tolypocladium ophioglossoides
Source: MDPI journal article supplement (doi:10.3390/jof8050510), 2022-05-16
Supplement: s1 [file s1]

# Supplementary Material

## Gram-Level Production of Balanol through Regulatory Pathway and Medium Optimization in Herb Fungus *Tolypocladium ophioglossoides*

Rui-Qi Li <sup>1,2</sup>, Xiang Liu <sup>1,2</sup>, Min Zhang <sup>1,2</sup>, Wei-Qun Xu <sup>1</sup>, Yong-Quan Li <sup>2</sup> and Xin-Ai Chen <sup>1,2,\*</sup>

Table S1. Primers used in this study.

| Primer                  | Sequence                                   |
|-------------------------|--------------------------------------------|
| blnR-F                  | tgatatcgatccgaattcATGGCCTCAGAAACCCGCGCC    |
| blnR-R <sup>DBD</sup>   | aagcttgatcgacggagctcGGACGTCGTCGACCCGAAAGCC |
| blnR-R <sup>180aa</sup> | agcttgatcgacggagctcATCAACGGGTGCATTCTGGTGC  |
| blnR-R <sup>292aa</sup> | agcttgatcgacggagctcGGACGAAGCGTCACCACTTTCA  |
| blnR-R <sup>361aa</sup> | agcttgatcgacggagctcGTCAGCACTGTCCAAGGTGTGC  |
| AbaA-qRT-F              | ACATGTCGGCTTTGGACAACTG                     |
| AbaA-qRT-R              | CACATGGCTGTCCATCGCATC                      |
| BrlA-qRT-R              | CTCTTGTTTCGATCACTGGCACAG                   |
| BrlA-qRT-F              | GTGCCACAAGGCTTTCCGTC                       |
| FlbC-qRT-R              | GCGGTGGACTTTTCGGTGTC                       |
| FlbC-qRT-F              | GACTCATGGGCTCCCAAATGC                      |
| FlbD-qRT-F              | GACCAGCCACTGCCTAGCAG                       |
| FlbD-qRT-R              | CAGCCTTCTCATATCCATCCGC                     |
| FluG-qRT-F              | GAGGAGCCAGCATCGCTTTC                       |
| FluG-qRT-R              | GTCCATCGACTCGAGCAATTC                      |
| FAM-P1F                 | AATAAAGGAGGCGCGACGG                        |
| P1-R                    | CAACTGTGCCTGTTGGGTCTG                      |
| FAM-P2F                 | CATCGTGCCAGCTGAAGCG                        |
| P2-F                    | TAACATCCGGTGGTCGGAGTTTG                    |
| FAM-P3F                 | TGCCATCTGGACGAAGTCGG                       |
| P3-R                    | GAGGGCTTCATCGGACCCGA                       |
| FAM-P4F                 | GCATTGAGTCCCCAGAGCCA                       |
| P4-R                    | CTGGCCGGCTCGACATAATACT                     |
| FAM-P5F                 | GGATCCAGAAGAGGCTTGCAG                      |
| P5-R                    | TCATTTGACGGGCCGATTGTC                      |
| FAM-P6F                 | AAGGCAATGGCGGAATGCAC                       |
| P6-R                    | GGCAAGGGCAATCTGAGAAGC                      |
| FAM-P7F                 | TGCCGTTCCACAATTCCGGT                       |
| P7-R                    | GGTGGCAAATATGTGCGGTTGT                     |
| FAM-PA8F                | CGCGGGTTTCTGAGGCCATA                       |
| P8-R                    | GCTTCGCGGTGTCGTTGGA                        |

|          |                        |
|----------|------------------------|
| FAM-P9F  | CCAACGACTGAGCCAGTGAG   |
| P9-R     | TTGGACAGCCGGCGTCATT    |
| FAM-P10F | TCCAAGAGCTCCTCCAGGCT   |
| P10-R    | ATGATGCTGCCCATGATGCTGC |
| FAM-P11F | GCAACTTGTGAACGGGGATCG  |
| P11-R    | CCGAGTCGTGCGACTGCTTA   |
| FAM-P12F | GACGATGGCCTTGAGGCGTA   |
| P12-R    | CCGACACCCTGTTCGAATTGG  |

**Table S2.** The scheme and experimental results of response surface design.

| Run | A-Sucrose (g/L) | B-Polypeptone (g/L) | C-pH   | Balanol (mg/L) |
|-----|-----------------|---------------------|--------|----------------|
| 1   | -1(90)          | 1(15)               | 0(4.5) | 672.46         |
| 2   | -1              | 0(10)               | -1(4)  | 509.31         |
| 3   | 1(120)          | 0                   | 1(5)   | 1013.23        |
| 4   | 0(105)          | 0                   | 0      | 1785.25        |
| 5   | 0               | 0                   | 0      | 1593.02        |
| 6   | -1              | 0                   | 1      | 1199.81        |
| 7   | 0               | 0                   | 0      | 1947.94        |
| 8   | 1               | 1                   | 0      | 920.087        |
| 9   | 0               | 0                   | 0      | 1880.35        |
| 10  | 0               | 1                   | -1     | 468.53         |
| 11  | 0               | -1(5)               | -1     | 852.54         |
| 12  | 0               | 1                   | 1      | 1285.83        |
| 13  | 0               | -1                  | 1      | 1453.14        |
| 14  | 1               | -1                  | 0      | 841.99         |
| 15  | -1              | -1                  | 0      | 1024.14        |
| 16  | 1               | 0                   | -1     | 458.00         |
| 17  | 0               | 0                   | 0      | 1867.72        |
